# Supplementary material
Source: PubMed Central journal article supplement (PMC11386875)
Supplement: PBI-17-812-s001.pdf [file PBI-17-812-s001.pdf]

## Supplemental Figures

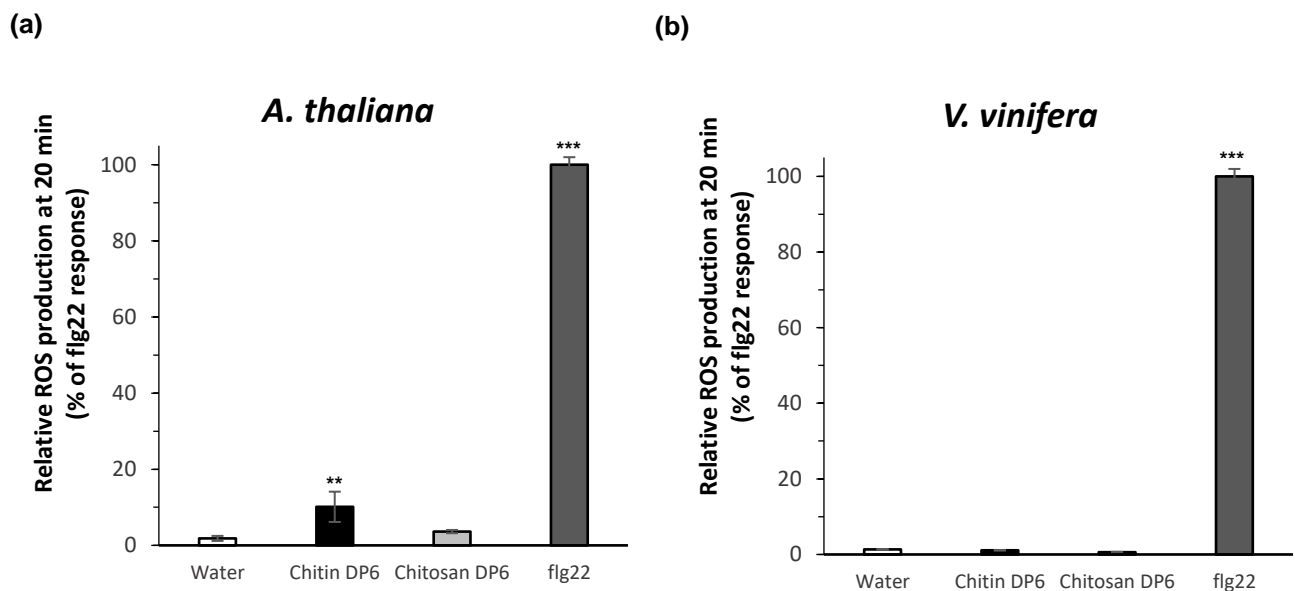

**Fig. S1. Chitin and chitosan DP6 did not induce similarly ROS production in *Arabidopsis* and grapevine cells.** Relative H<sub>2</sub>O<sub>2</sub> production in (a) *A. thaliana* or (b) *V. vinifera* cells 20 min post-treatment with chitin DP6 (100 µg mL<sup>-1</sup>), chitosan DP6 (100 µg mL<sup>-1</sup>) and flg22 (1 µM) treatments or water (negative control). ROS production was measured by chemiluminescence of luminol according to Trdá et al. (2014) and results are expressed relatively to flg22 (positive control=100%). Values are means ± SE from three independent experiments (n=3). Asterisks indicate a statistically significant difference between control and the elicitor treatment (Tukey's pairwise test; \*, P < 0.05, \*\*, P < 0.01, \*\*\*, P < 0.001).

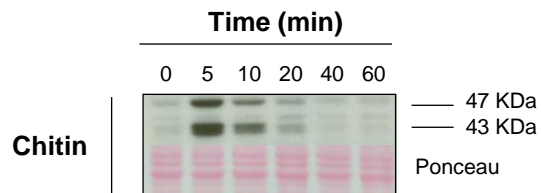

**Fig. S2. The crab shell chitin also induced defense responses in grapevine cells.** Activation kinetics of two mitogen-activated protein kinases (MAPKs) in grapevine cells treated with  $100 \mu\text{g.mL}^{-1}$  of the unpurified crab shell chitin NA-COS-Y (Lloyd et al., 2014). MAPKs were detected by immunoblot with an antibody raised against the human phosphorylated extracellular regulated protein kinase 1/2 ( $\alpha\text{-pERK1/2}$ ). Fifteen  $\mu\text{g}$  of proteins were loaded in each lane. Homogeneous loading was checked by Ponceau red staining. This result shows one representative experiment out of three.

|              |     | Signal peptide                    |                               |
|--------------|-----|-----------------------------------|-------------------------------|
| AtCERK1/LYK1 | 1   | MKIKIS-LIAPILLI-----FSFFFVAVESKCR | RTSCPLALASYYLENGITLTSVINQNLS  |
| OsCERK1      | 1   | MEASTS-LLVLLVLAFAAF-AAGTVTEAAGDGC | SAGCDLALASFYVTPNQNVTNMADIFGI  |
| VvLYK1-1     | 1   | MKQKV-----GLGFFVLLSVFCVAVDSQC     | SRGCDLALGSYYVWQGSNLTFTISQLFQT |
| VvLYK1-2     | 1   | MVTSNSRNATQILAFGFHFLVLLCSKANAKC   | SRGCDLALASYVVDGNSLTYIRKIFGR   |
| VvLYK1-3     | 1   | MLVFRISRFEMLLV---FVSLVIFLSIGVESK  | CRGCDLALASYNINWNGITLSFIATAFST |
|              |     | LysM1                             |                               |
| AtCERK1/LYK1 | 54  | SIAPYDQINFDPILRYNSNIKDKDRIQMGSR   | VLPF-PCFCQP-----GDFLGHNFYS    |
| OsCERK1      | 59  | GAAN-----YRSIAPYNPNIPLDFINVGGR    | VNYF-TGCRSLPGSPGATYLAGAFPFQ   |
| VvLYK1-1     | 52  | TI-----SEILSYNSQIANQDSVEADTRIR    | VPYSSDCIN-----GEFLGKVFNYT     |
| VvLYK1-2     | 61  | EI-----SEILKYNPQINQDSIDTGSRIN     | VPF-RCDCLN-----GDFLGHTEFYT    |
| VvLYK1-3     | 58  | SI-----SEIQSFNPQINDIDLIIIVDTRL    | NIPF-SCSCID-----GEFLGHTEFYT   |
|              |     | LysM2                             |                               |
| AtCERK1/LYK1 | 107 | VROEDTYERVAISNYANLTTMESLQARNPFP   | PATNIPL-SATLNVLVNVCSCGDES     |
| OsCERK1      | 113 | MSRGOITYTSVAA-NYNNLTTAEWLQATNSYP  | ANNIPD-TAVINATVNCSCGDASIS     |
| VvLYK1-1     | 98  | VQSGDTYLVAETIYNSLTTSAWLQNFNSYA    | ANLIPDTDAYLNVTLNCSCGNST       |
| VvLYK1-2     | 106 | TQFGDTYRIRIAERAFSNLTTEDWVHRVNE    | YPPTRIPD-DVQINVTVNCS          |
| VvLYK1-3     | 103 | VDSNDTYNIIARTFYANLTTVEWLERFNRYE   | ATEIPV-NAIINVTVNCS            |
|              |     | LysM3                             |                               |
| AtCERK1/LYK1 | 166 | LFVITYPLRPEDSLSSIARSSGVSAD--ILQ   | RYPNGVNFNSGNGIVYVPRDPNGA      |
| OsCERK1      | 171 | LFLTYPLRAEDTLASVAATYGLSSQLDVVRR   | YNPMEASATGSGIVYIPVKDPNGS      |
| VvLYK1-1     | 158 | LFLSYPLRPEDNLSVAESEGLNAS--LLQSY   | NPDSNFSAGSGLVYIPTKDTSGS       |
| VvLYK1-2     | 165 | LFATYPLRDGENLSTVAAAAGITDD--LVRR   | YNPAADFSAIGLVFVPAKQDQET       |
| VvLYK1-3     | 162 | LFVITYPLQPGESLSSIANESGLPSK--LLQ   | DYNPGVDFSLGSGLVETPKDQNGS      |
|              |     | Transmembrane                     |                               |
| AtCERK1/LYK1 | 224 | SSKQDGVGAGVIAGIVIGVIVALLLILFIVY   | YA-YRKNKSKGDSFSSS--IPLSTK     |
| OsCERK1      | 231 | SP-GKGASAGAIAGGVVAGVV--VLA        | AIFLYIIFYRRRKAKQATLLQS--      |
| VvLYK1-1     | 216 | SS--TGLAGGVIAGISIAAVGVLLITVCI     | IYIGFYRKRKVKKEAALLPT--        |
| VvLYK1-2     | 223 | LS-NSGISSGVIAGISVAGIVGSLFAFFL     | FARICKRKKVKVLFPAASEQQYMQ      |
| VvLYK1-3     | 220 | LS-ONGISVGIAGISVAGVAGSLLAFVLY     | VGIYKRKMG-KAPLLPAAFEDQHM      |
|              |     | Serine/Threonine Kinase           |                               |
| AtCERK1/LYK1 | 337 | YYAELRGEKAAIKKMDMEASKQFLAELKVL    | TRVHHVNLVRLIGYCVESLFLVYEY     |
| OsCERK1      | 339 | YYAELRGEKAAIKKMDMQATHEFLAELKVL    | THVHHLNLVRLIGYCTESLFLVYEY     |
| VvLYK1-1     | 331 | YYAELRGEKAAIKKMDMQASREFLAELKVL    | THVHHLNLVRLIGYCVESLFLVYEY     |
| VvLYK1-2     | 341 | YYAELRGEKAAIKKMDMQASKEFLAELKVL    | THVHHLNLVRLIGYCVESLFLVYEY     |
| VvLYK1-3     | 337 | YYAELQGGKAAIKKMDMQASKEFLAELKVL    | THVHHFNLVRLIGYCVTGSLETVY      |
| AtCERK1/LYK1 | 397 | NLQHLHGSGREPLPWTKRVOIALDSARGLE    | YIHEHTVPVYVHRDIKSANILIDQ      |
| OsCERK1      | 399 | NLSQHLRGMGYEPLSWAARIQIALDSARGLE   | YIHEHTVPVYIHRDIKSANILIDKN     |
| VvLYK1-1     | 391 | NLSQHLRSGRDPLQWSSRVQIALDSARGLE    | YIHEHTVPVYIHRDIKSANILIDKN     |
| VvLYK1-2     | 401 | NLSHHLRSGKDPWPSSRVQIALDSARGLE     | YIHEHTVPVYIHRDIKIPANILIDK     |
| VvLYK1-3     | 397 | NLSQHLRSGNDPLPWSTRVQIALDAARGLE    | YIHEHTVPVYVHRDIKSANILIDKN     |
| AtCERK1/LYK1 | 457 | VADFGTLTKLTEVGGSSAT---RGAMGTFG    | YMAPET-VYGEVSAKVDVYAFGVV      |
| OsCERK1      | 459 | VADFGTLTKLTEVGGTSMPTGTRVVGTFG     | YMPPEYARYGDVSPKVDVYAFGVV      |
| VvLYK1-1     | 451 | VADFGTLTKLTEVGSSSLP--TRLVGTFG     | YMPPEYAQYGDVSPKVDVYAFGVV      |
| VvLYK1-2     | 461 | VADFGTLTKLTEVGSASIP--TRLVGTFG     | YMPPEYAQYGDVSPKIDVFAFGV       |
| VvLYK1-3     | 457 | VADFGTLTKLTVAGSSSLP--TRLVGTFG     | YMPPEYAQFGAVTPKIDVYAFGVV      |

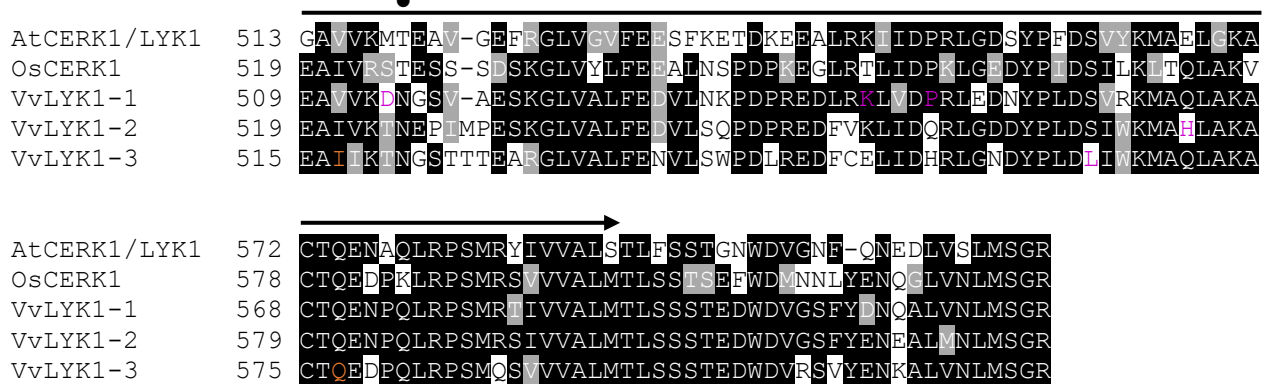

**Fig. S3. Alignment of AtCERK1/LYK1, the rice OsCERK1 and its putative orthologs in grapevine (VvLYK1-1/-2/-3).** Protein sequences were aligned with T-Coffee. Black and gray shading representing identical and positive amino acids, respectively, was visualized with Boxshade. The predicted signal peptide, the lysin motifs (LysM), the transmembrane region and the serine/threonine (S/T) kinase are shown. The residues of the chitin-binding site in AtCERK1/LYK1 LysM2 are indicated by asterisks and their conservation is highlighted in the grades of green. The residues E110, E114 and I141 bind to N-acetyl moieties of (GlcNAc)<sub>5</sub>, while Q109, T112, Y113, A138, T139, N140, P142 and L143 interact with hydroxyl and hydroxymethyl groups of glucose part (Liu *et al.*, 2012). Conserved Cys residues (in red) form disulfide bridges (indicated by arrows). The RD type of kinase is highlighted in blue. SNPs between the NCBI reference sequence from *V. vinifera* cv Pinot Noir (PN40024) and cv Cabernet-Sauvignon are highlighted in purple (VvLYK1-1: Q99H, L220I, A221S, H264Q, S265T, S313T, D514E, K543R, P547A; VvLYK1-2: K67T, E73K, G95R, I186V, E216G, R279G, H574Q; VvLYK1-3: F116Y, I142L, V250A, A493E, L564F) or in orange when compared to cv Gamay (VvLYK1-1: no SNP; VvLYK1-2: no SNP; VvLYK1-3: -224A, V250A, A493E, I517V, Q577L). Residues S266, S268, S270, S274 and T519 (indicated by ●) were found to be phosphorylated in AtCERK1/LYK1 after chitin treatment (Petutschnig *et al.*, 2010). A: Ala, C:Cys, D:Asp, E:Glu, F:Phe, G:Gly, H:His, I:Ile, K:Lys, L:Leu, M:Met, N:Asn, P:Pro, Q:Gln, R:Arg, S:Ser, T:Thr, V:Val, W:Trp, Y:Tyr.

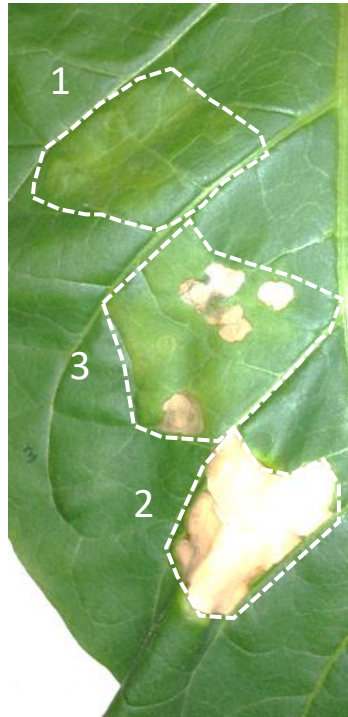

**Fig. S4. Necrosis observed in response to the over-expression of VvLYK1-2 in *Nicotiana benthamiana*.** Symptoms observed 2d after leaf infiltration with (1) *A. tumefaciens* GV3101 alone (negative control), (2) *A. tumefaciens* GV3101 containing the construct *RPV1<sup>TIR1-193</sup>* (positive control; Williams et al. 2016), (3) *A. tumefaciens* GV3101 containing the construct *pART27-VvLYK1-2*.

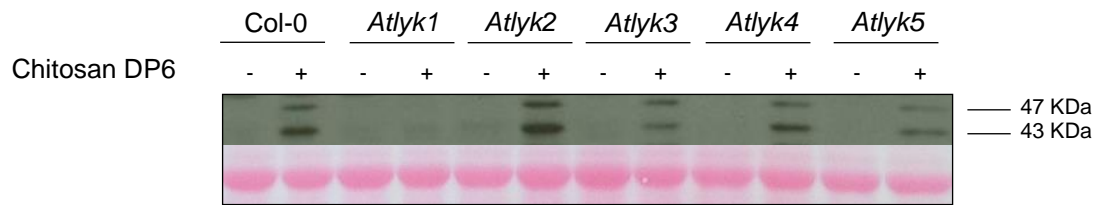

**Fig. S5. Immunodetection of MAPKs in *Arabidopsis* mutants *Atlyk1-5* in response to chitosan.** Plants of the different *Arabidopsis Atlyk* mutants have been treated with 1 mg.mL<sup>-1</sup> chitosan DP6 for 10 min before protein extraction. Activation of the two MAPKs was detected by immunoblot with an antibody raised against the human phosphorylated extracellular regulated protein kinase 1/2 ( $\alpha$ -pERK1/2). Fifteen  $\mu$ g of proteins were loaded in each lane. Homogeneous loading was checked by Ponceau red staining. Similar results were obtained in three independent experiments.

## Supplemental Tables

**Table S1. The *Vitis vinifera* VvLYK family contains 15 putative genes in the grapevine genome.**

| NCBI Gene                                      | NCBI mRNA             | NCBI Protein          | Previous annotation (Zhang et al. 2009) | Closest Arabidopsis homolog | Suggested new gene name | Gene length <sup>1</sup> (bp) | Expression validated with EST data | Expression validated with RNA-Seq data |
|------------------------------------------------|-----------------------|-----------------------|-----------------------------------------|-----------------------------|-------------------------|-------------------------------|------------------------------------|----------------------------------------|
| LOC100255092                                   | XM_010658923.2        | XP_010657225.1        | VvLYK1                                  | AtLYK1                      | VvLYK1-1                | 1 845                         | Y                                  | Y                                      |
| LOC100257218                                   | XM_010657064.2        | XP_010655366.1        | VvLYK2                                  | AtLYK1                      | VvLYK1-2                | 1 878                         | Y                                  | Y                                      |
| LOC100262323                                   | XM_010657063.2        | XP_010655365.1        | VvLYK3                                  | AtLYK1                      | VvLYK1-3                | 1 866                         | Y                                  | Y                                      |
| LOC100264694                                   | XM_019225274.1        | XP_019080819.1        | VvLYK11                                 | AtLYK2                      | VvLYK2                  | 2 028                         | Y                                  | Y                                      |
| LOC100256626                                   | XM_002283592.4        | XP_002283628.2        | VvLYK12                                 | AtLYK3                      | VvLYK3-1                | 1 815                         | Y                                  | Y                                      |
| <b>LOC100250732</b>                            | <b>XM_019219283.1</b> | <b>XP_019074828.1</b> | <b>Not described</b>                    | <b>AtLYK3</b>               | <b>VvLYK3-2</b>         | <b>Unknown</b>                | <b>No ESTs</b>                     | <b>Incomplete coverage</b>             |
| <b>LOC100256178</b>                            | <b>XM_002272778.4</b> | <b>XP_002272814.3</b> | <b>Not described</b>                    | <b>AtLYK3</b>               | <b>VvLYK3-3</b>         | <b>Unknown</b>                | <b>2 ESTs</b>                      | <b>Incomplete coverage</b>             |
| LOC100242712                                   | XM_002269372.3        | XP_002269408.1        | VvLYK4                                  | AtLYK4                      | VvLYK4-1                | 2 037                         | 1 EST                              | Y                                      |
| LOC100264999                                   | XM_010650900.2        | XP_010649202.1        | VvLYK6                                  | AtLYK4                      | VvLYK4-2                | 1 947                         | 1 EST                              | Y                                      |
| LOC100258108                                   | XM_002277295.4        | XP_002277331.3        | VvLYK10                                 | AtLYK5                      | VvLYK5-1                | 2 167                         | Y                                  | Y                                      |
| Not annotated: tBLASTn match on emb AM480420.1 | MF939897              | New sequence          | Not described                           | AtLYK5                      | VvLYK5-2                | 2 078                         | Y                                  | Y                                      |
| LOC100264758                                   | XM_002280034.2        | XP_002280070.1        | VvLYK7                                  | No match                    | VvLYK6                  | 2 200                         | No ESTs                            | Y                                      |
| <b>LOC100259809</b>                            | <b>XM_002269436.4</b> | <b>XP_002269472.2</b> | <b>VvLYK5</b>                           | <b>No match</b>             | <b>VvLYK7</b>           | <b>Unknown</b>                | <b>No ESTs</b>                     | <b>Incomplete coverage</b>             |
| <b>LOC100248852</b>                            | <b>XM_002281844.3</b> | <b>XP_002281880.2</b> | <b>VvLYK8</b>                           | <b>No match</b>             | <b>VvLYK8</b>           | <b>Unknown</b>                | <b>1 EST</b>                       | <b>Incomplete coverage</b>             |
| <b>LOC100248488</b>                            | <b>XM_002276794.3</b> | <b>XP_002276830.3</b> | <b>VvLYK9</b>                           | <b>No match</b>             | <b>VvLYK9</b>           | <b>Unknown</b>                | <b>2 ESTs</b>                      | <b>Incomplete coverage</b>             |

<sup>1</sup> Gene length based on Cabernet Sauvignon sequence - verified by RNA Seq data. Genes in bold = putative pseudogene

**Table S2. Percentage of amino acid identity or similarity between VvLYK1-1/-2/-3 and AtCERK1/LYK1 or OsCERK1.**

|                     | whole protein sequence |            | LysM domain |            | Kinase domain |            |
|---------------------|------------------------|------------|-------------|------------|---------------|------------|
|                     | Identity               | Similarity | Identity    | Similarity | Identity      | Similarity |
| VvLYK1-1 vs AtCERK1 | 60%                    | 73%        | 46%         | 68%        | 77%           | 85%        |
| VvLYK1-2 vs AtCERK1 | 57%                    | 71%        | 44%         | 65%        | 74%           | 84%        |
| VvLYK1-3 vs AtCERK1 | 56%                    | 69%        | 51%         | 68%        | 70%           | 80%        |
| VvLYK1-1 vs OsCERK1 | 61%                    | 73%        | 44%         | 58%        | 80%           | 91%        |
| VvLYK1-2 vs OsCERK1 | 58%                    | 71%        | 42%         | 57%        | 79%           | 89%        |
| VvLYK1-3 vs OsCERK1 | 56%                    | 70%        | 43%         | 61%        | 74%           | 86%        |

Results were obtained with the NCBI protein BLAST program on the whole protein sequence or the LysM ectodomain or the kinase domain. Protein sequences used: AtCERK1/LYK1 (NP\_566689), OsCERK1 (A0A0P0XII1), VvLYK1-1 (XP\_010657225), VvLYK1-2 (XP\_010655366), VvLYK1-3 (XP\_010655365). Lys Motifs (LysM, PF01476) and Kinase domain (PF07714) were annotated with SMART. The signal peptide and the outer juxtamembrane region were not included in each LysM domain.



**Table S3. Primers used in this study.** For each primer, gene family, name used (ID), sequence (5'→ 3') and usage are reported. Underlined cacc is used for Gateway directional TOPO cloning. Letters in bold indicate restriction sites added to the 5' end of gene-specific primer sequences to facilitate cloning.

| Gene Family        | ID                 | Sequence (5'-3')                       | Usage                    |
|--------------------|--------------------|----------------------------------------|--------------------------|
| VvLYK1-1           | VvLYK1-1_RT_F      | tacatgccaccagaatacgc                   | Semi-quantitative RT-PCR |
|                    | VvLYK1-1_RT_R      | aaggtcctctctggtgatcag                  | Semi-quantitative RT-PCR |
|                    | VvLYK1-1_R2        | taaacagatccaaagccacc                   | Genotyping               |
|                    | VvLYK1-1_F2        | gtgggctgtttacattcctac                  | Genotyping               |
|                    | VvLYK1-1_qF        | tggctttgttcgaggatgtg                   | qPCR                     |
|                    | VvLYK1-1_qR        | cgagtgggtagtattcttcaagc                | qPCR                     |
|                    | VvLYK1-1_Xho_F     | cg <b>ctcga</b> gcaaatgaaacagaaggtggg  | Vector construction      |
|                    | VvLYK1-1_Xba_R     | cg <b>ctcga</b> aagaaaaatggtgaagtattg  | Vector construction      |
|                    | VvLYK1-1_GW_F      | <u>cacc</u> atgaaacagaaggtgggttaggg    | Gateway construction     |
|                    | VvLYK1-1_GW_R      | ggcccttcagacattagattgacgagg            | Gateway construction     |
| VvLYK1-2           | VvLYK1-2_RT_F      | cgcttctgtgggtacatttgg                  | Semi-quantitative RT-PCR |
|                    | VvLYK1-2_RT_R      | tcctcaaacaaagcaacgag                   | Semi-quantitative RT-PCR |
|                    | VvLYK1-2_F2        | cccgaattgtaaaaggaag                    | Genotyping               |
|                    | VvLYK1-2_R2        | cacaggaactgtatgctcatg                  | Genotyping               |
|                    | VvLYK1-2_qF        | gaccagaggcttgagatga                    | qPCR                     |
|                    | VvLYK1-2_qR        | catccaatcttcggtgatga                   | qPCR                     |
|                    | VvLYK1-2_Xba_R     | cg <b>ctcga</b> tgctaccttctgacattag    | Vector construction      |
|                    | VvLYK1-2_Xho_F     | gg <b>ctcga</b> aaacatggtcatttcaaac    | Vector construction      |
|                    | VvLYK1-2_GW_F      | <u>cacc</u> atggtcatttcaaacagcaggaacgc | Gateway construction     |
|                    | VvLYK1-2_GW_R      | ggcccttctgacattagattcatcagagcc         | Gateway construction     |
| VvLYK1-3           | VvLYK1-3_RT_F      | ttcttcattgccactcgtc                    | Semi-quantitative RT-PCR |
|                    | VvLYK1-3_RT_R      | caagtcctcttctcagtg                     | Semi-quantitative RT-PCR |
|                    | VvLYK1-3_R2        | atatcctatcaggcgaaccag                  | Genotyping               |
|                    | VvLYK1-3_F2        | gttgattcagccttgtagtg                   | Genotyping               |
|                    | VvLYK1-3_qF        | ggcaatgactaccacttgac                   | qPCR                     |
|                    | VvLYK1-3_qR        | ttagtgcgacaactactgactg                 | qPCR                     |
|                    | VvLYK1-3_Xba_R     | cg <b>ctcga</b> cacactatcttctgacatc    | Vector construction      |
|                    | VvLYK1-3_Xho_F     | g <b>ctcga</b> gccatcttctgtagggttc     | Vector construction      |
|                    | VvLYK1-3_GW_F      | <u>cacc</u> atgttggttttagaatcgaagg     | Gateway construction     |
|                    | VvLYK1-3_GW_R      | ggcttctctgacatcagattcactagagc          | Gateway construction     |
| Housekeeping genes | AtEF1_F            | tgagcagcgtcttctgttca                   | Semi-quantitative RT-PCR |
|                    | AtEF1_R            | ggtggtggcatccatctgttaca                | Semi-quantitative RT-PCR |
|                    | AtOLI_qF           | gagctgaagtggcttccatga                  | qPCR                     |
|                    | AtOLI_qR           | cgccgacatacccatgatcc                   | qPCR                     |
|                    | VvEF1 $\alpha$ _qF | gaactgggtgcttgatagcc                   | qPCR                     |
|                    | VvEF1 $\alpha$ _qR | aaccaaaatatccggagtaaaaga               | qPCR                     |
| Defense genes      | AtFRK1_qF          | tgaaggaagcggtcagattt                   | qPCR                     |
|                    | AtFRK1_qR          | ctgactcatcgttggcctct                   | qPCR                     |
|                    | VvCHIT4C_qF        | gcaaccgatgtgacatatca                   | qPCR                     |
|                    | VvCHIT4C_qR        | cgctgccctagcaagtgag                    | qPCR                     |
|                    | VvSTS1.2_qF        | aggaagcagcattgaagctc                   | qPCR                     |
|                    | VvSTS1.2_qR        | tgaccaggcatttctacacc                   | qPCR                     |
|                    | VvPAL_qF           | agtctccatggacaacaccg                   | qPCR                     |
|                    | VvPAL_qR           | tgctcagcacttctgacatgg                  | qPCR                     |
|                    | VvRBOHD_qF         | caccaccatgctcagtcctccat                | qPCR                     |
|                    | VvRBOHD_qR         | agcgatcttctgaagacttctgccc              | qPCR                     |
